# Supplementary material for: The syntheses, structures and characterizations of a series of frameworks constructed from polyoxometalates, metals and organic units
Source: Royal Society of Chemistry journal article supplement (doi:10.1039/c2ce26477c), 2012-10-24
Supplement: c2ce26477c.pdf [file c2ce26477c.pdf]

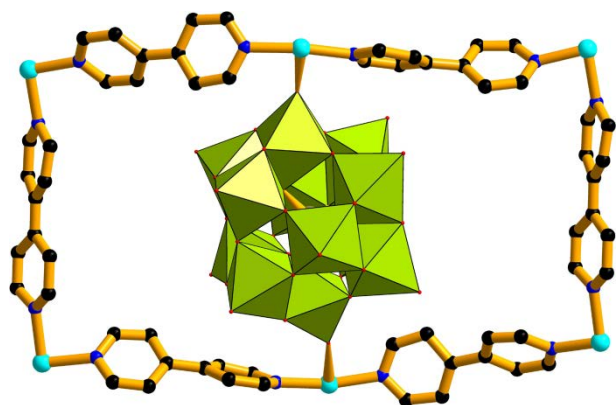

Fig. S1

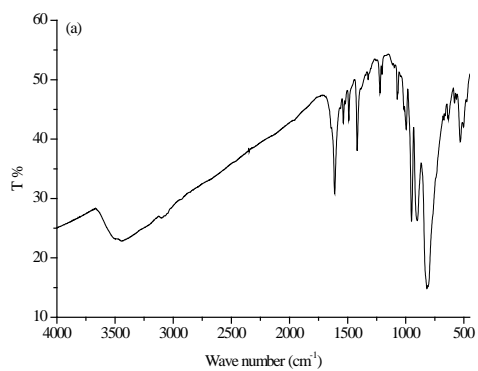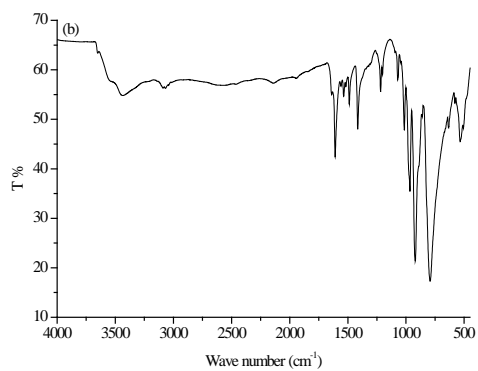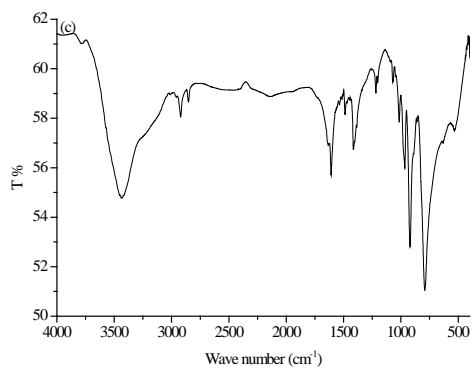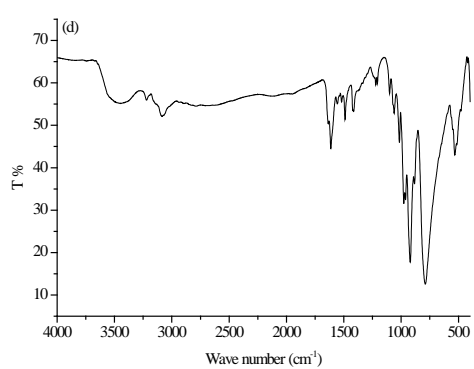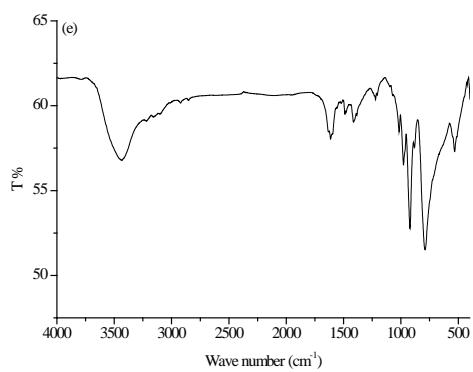

Fig. S2. The IR spectra for compound **1** (a), compound **2** (b), compound **3** (c), compound **4** (d) and compound **5** (e).

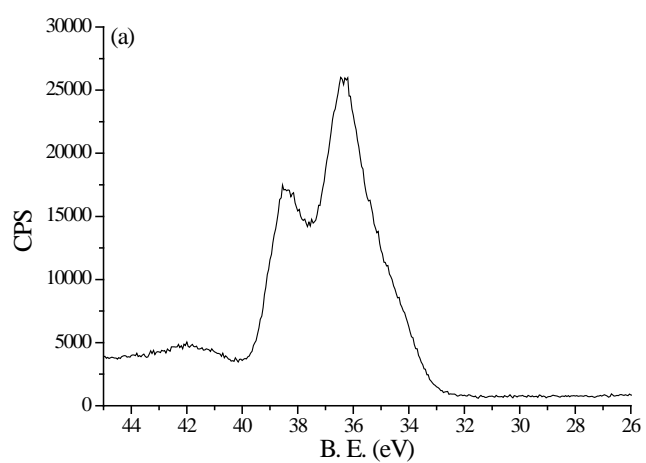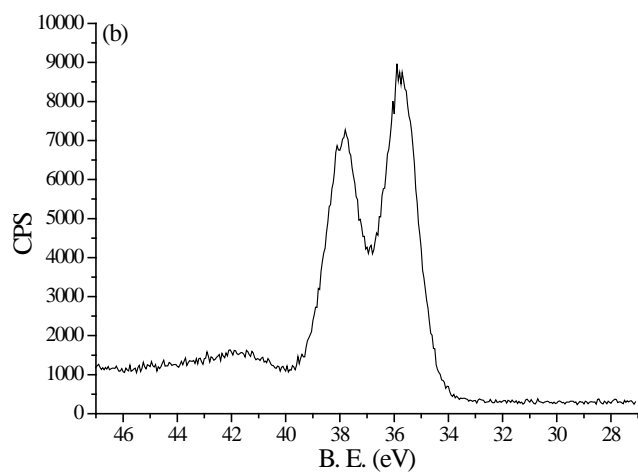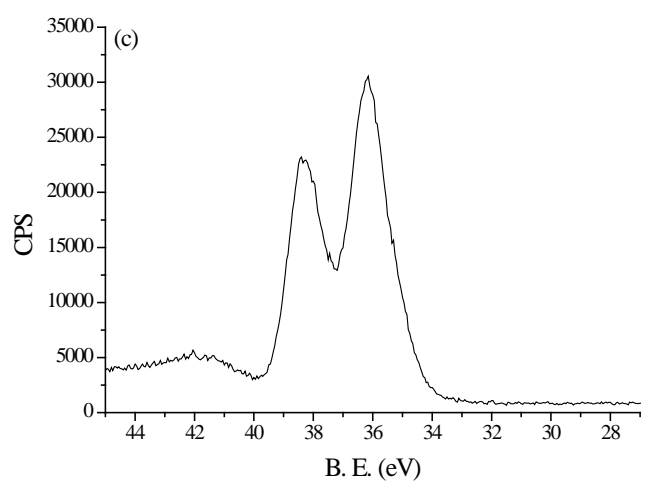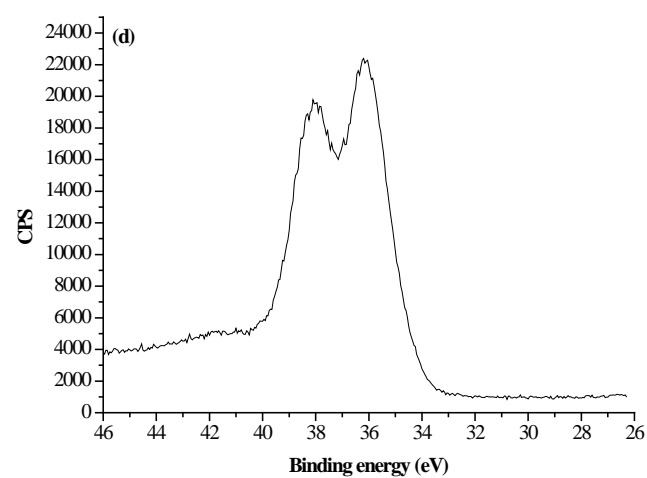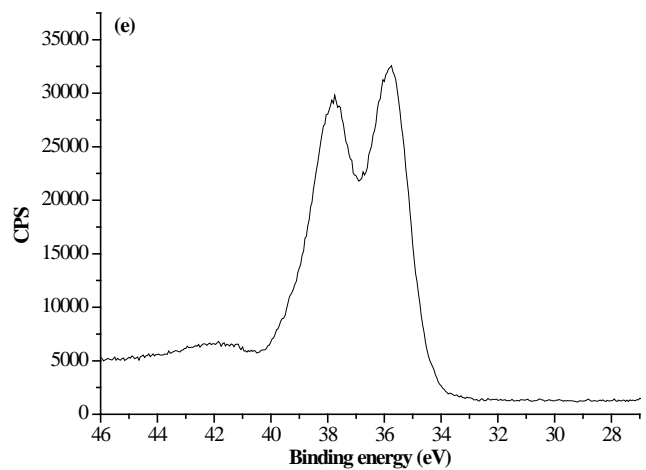

Fig. S3, the XPS spectra for compound **1** (a), compound **2** (b), compound **3** (c), compound **4** (d) and compound **5** (e).

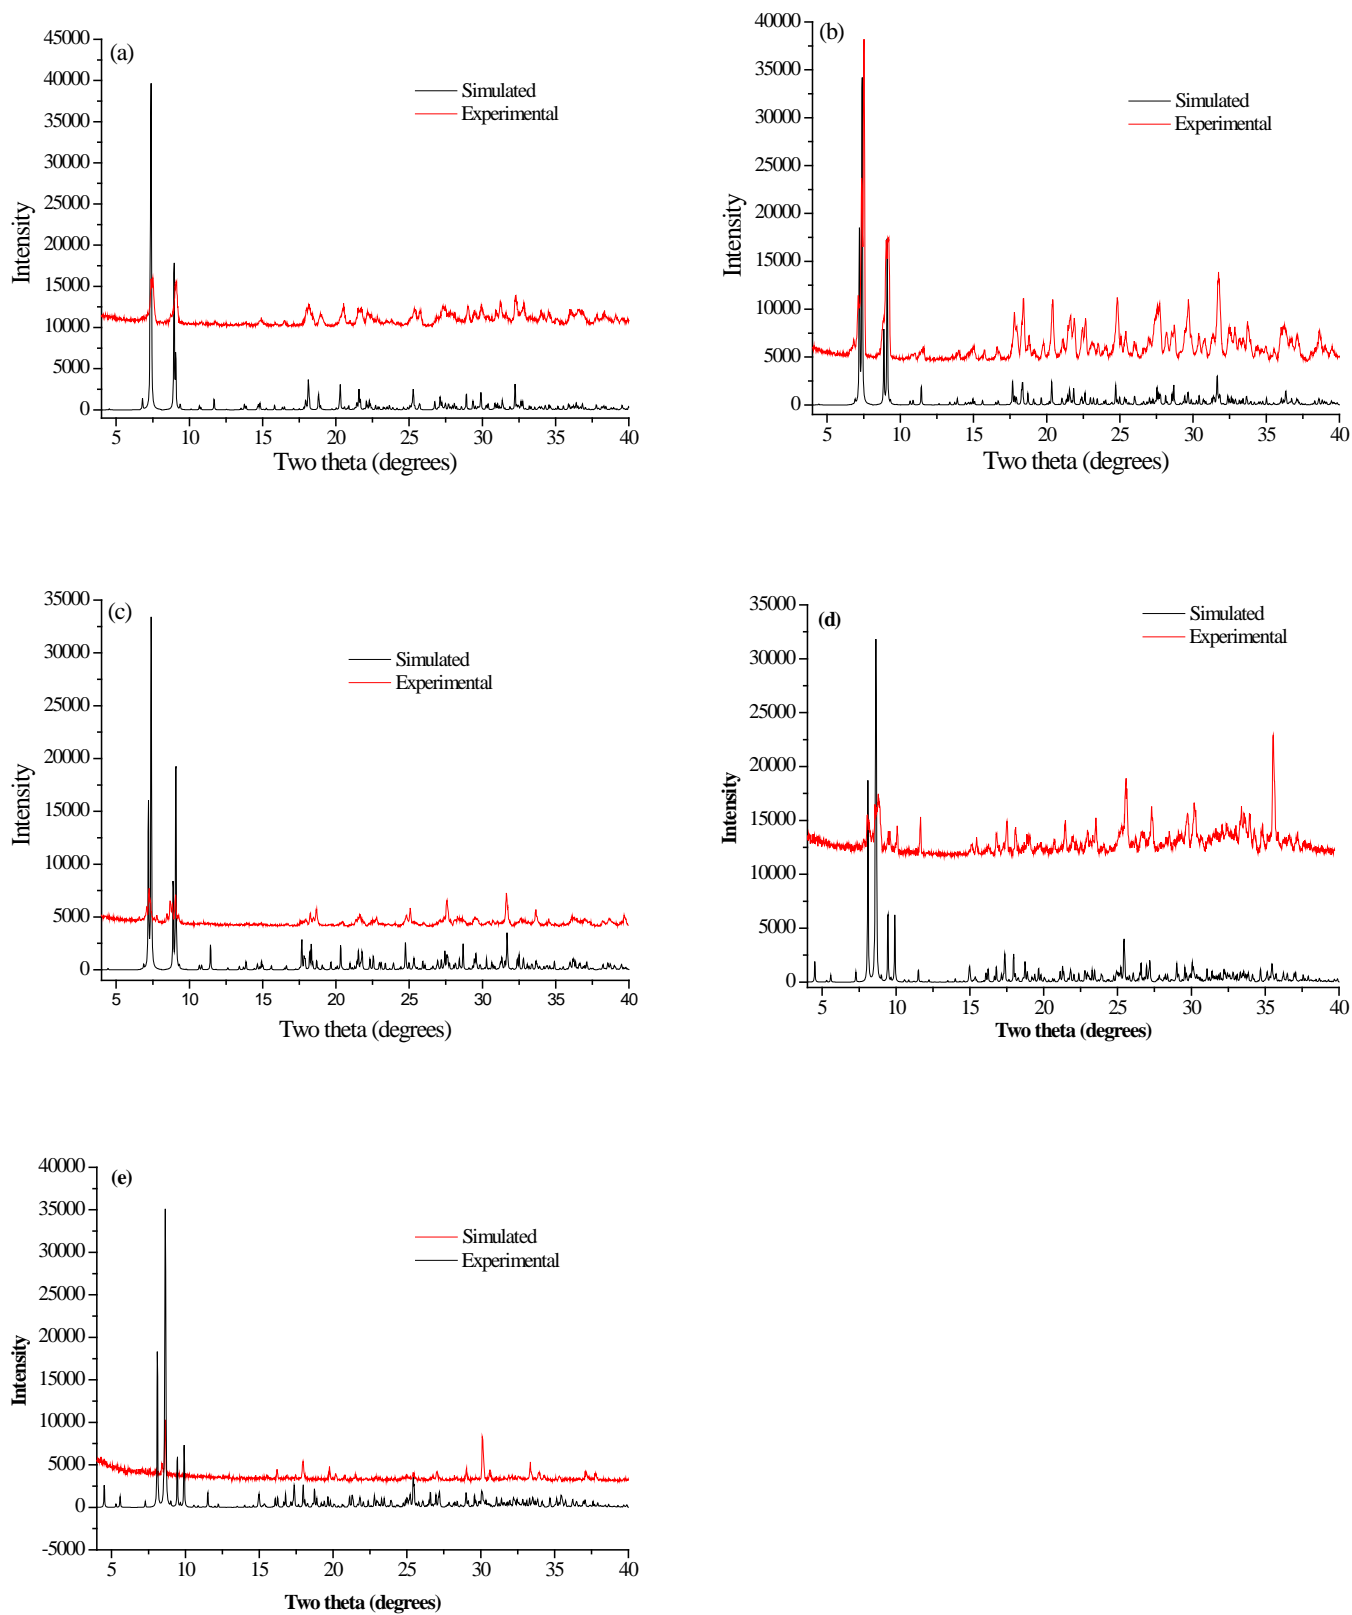

Fig. S4. (a) The experimental and simulated XRD pattern for compound **1**. (b) The experimental and simulated XRD pattern for compound **2**. (c) The experimental and simulated XRD pattern for compound **3**. (d) The experimental and simulated XRD pattern for compound **4**. (e) The experimental and simulated XRD pattern for compound **5**.

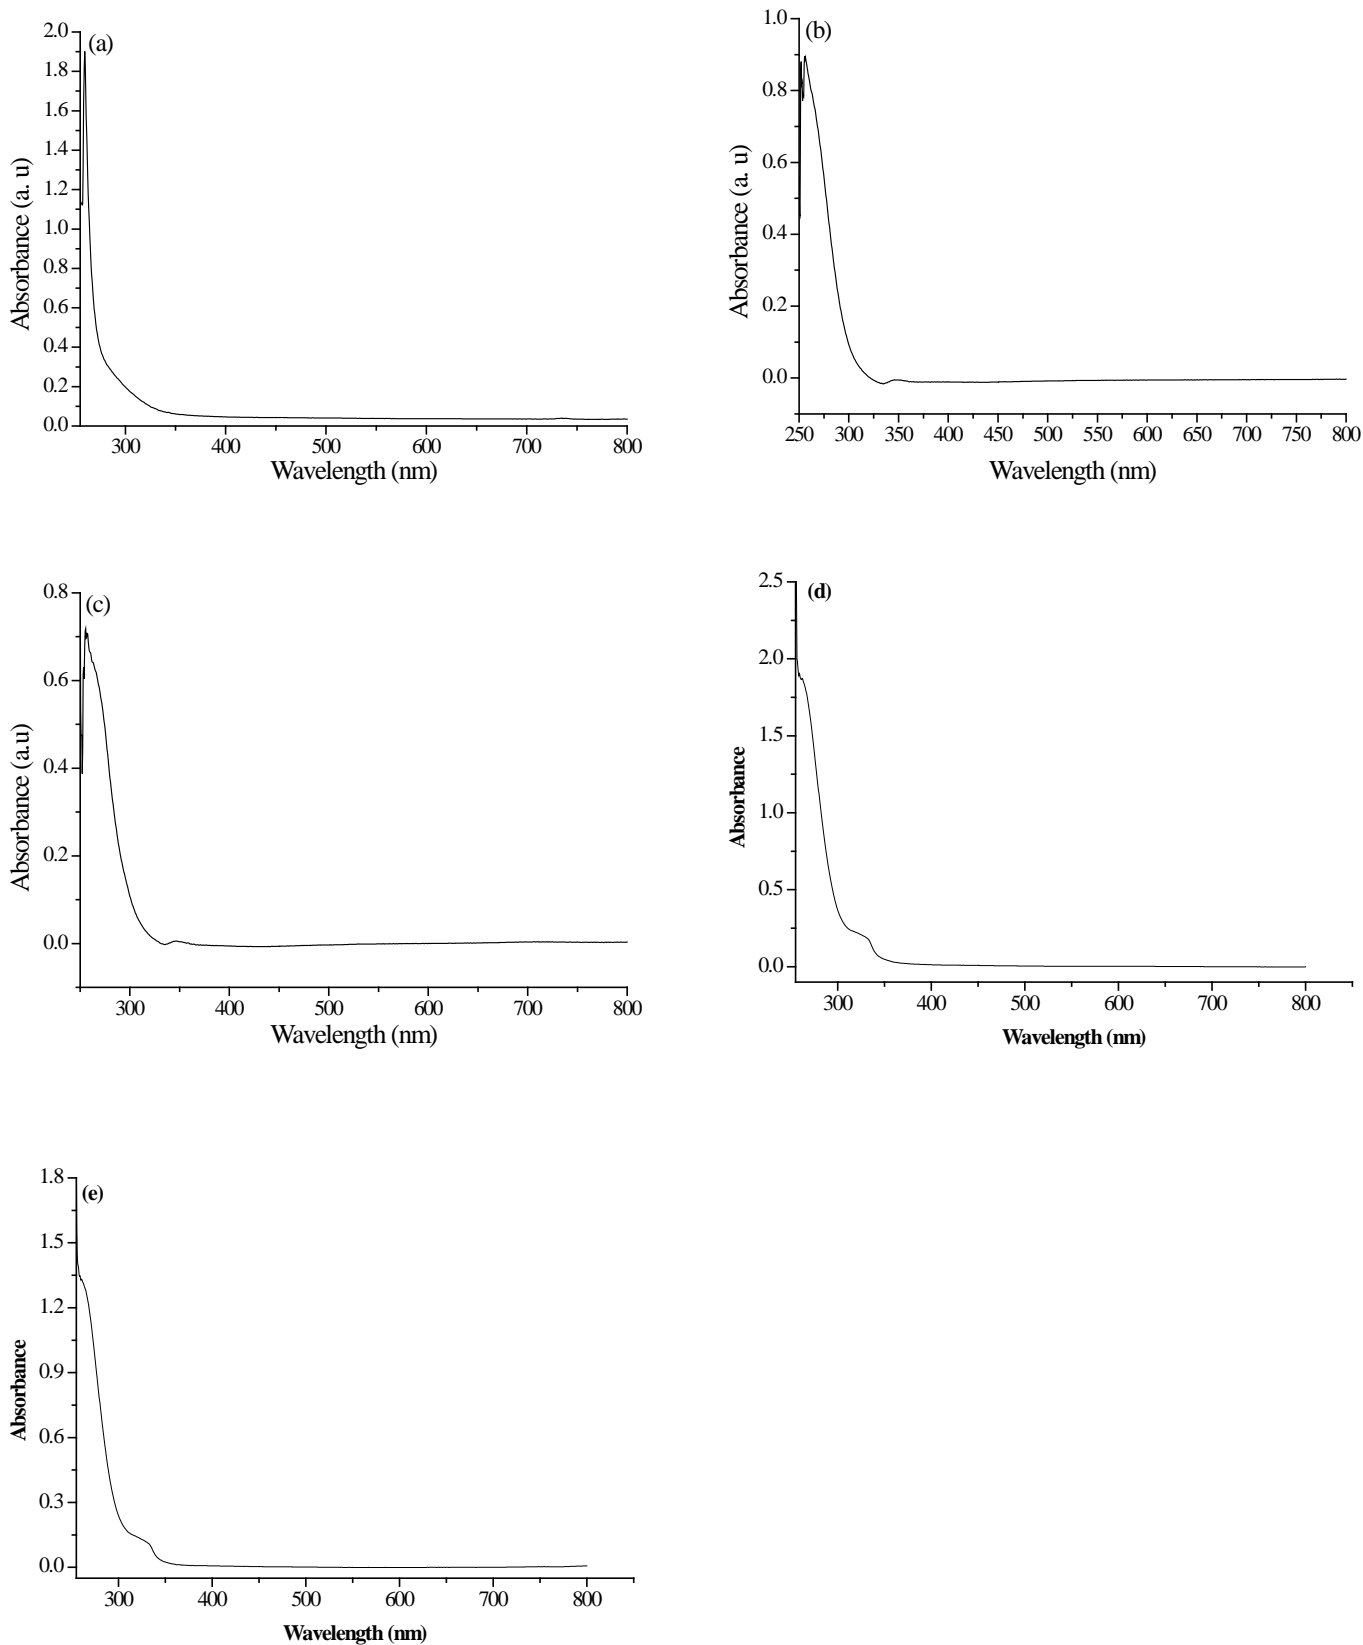

Fig. s5. The UV-Vis spectra for compound **1** (a), **2** (b), **3** (c), **4**(d) and **5**(e).

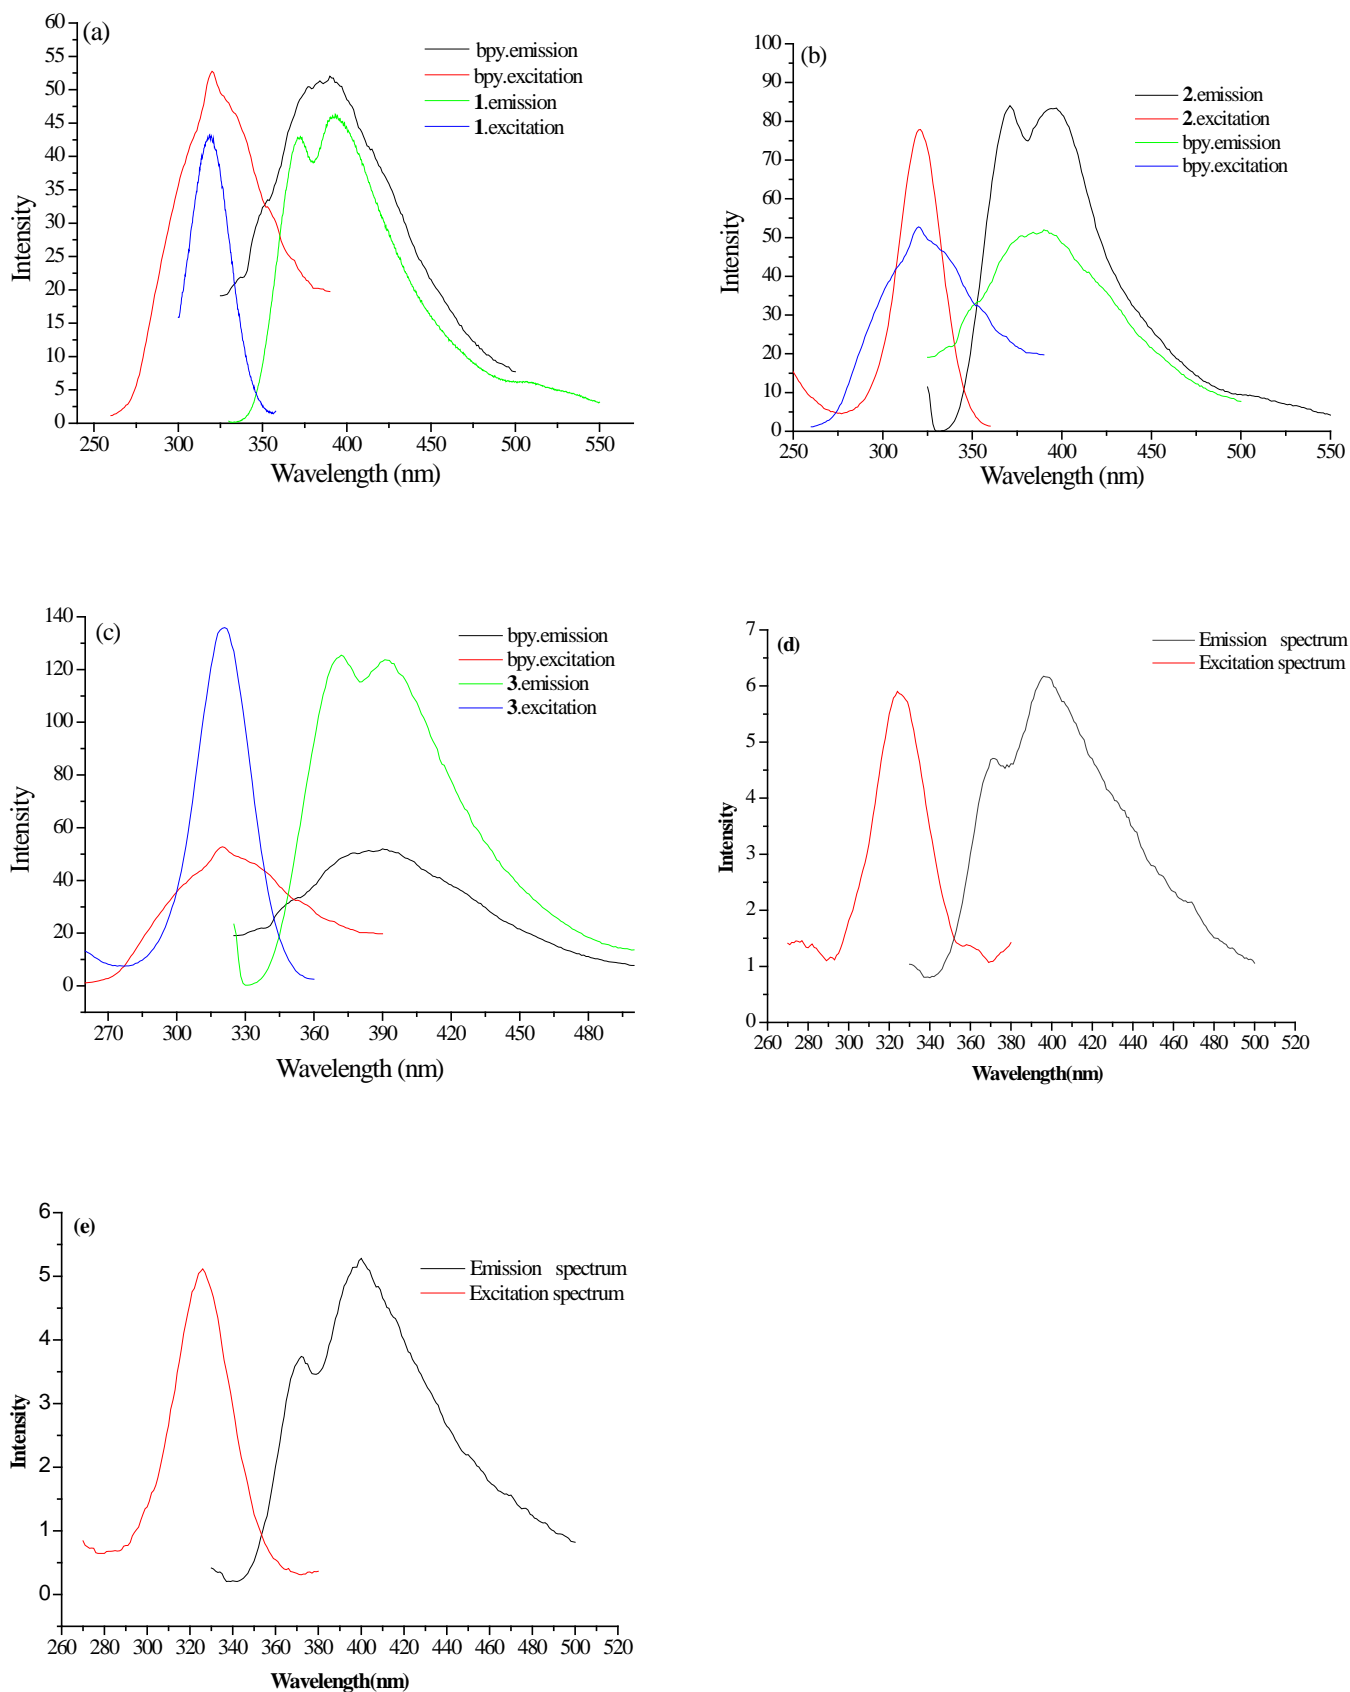

Fig. S6. The fluorescence properties of the free 4,4'-bpy and the compound **1** (a), **2** (b), **3** (c), **4** (d) and **5** (e) in the solid state at room temperature.

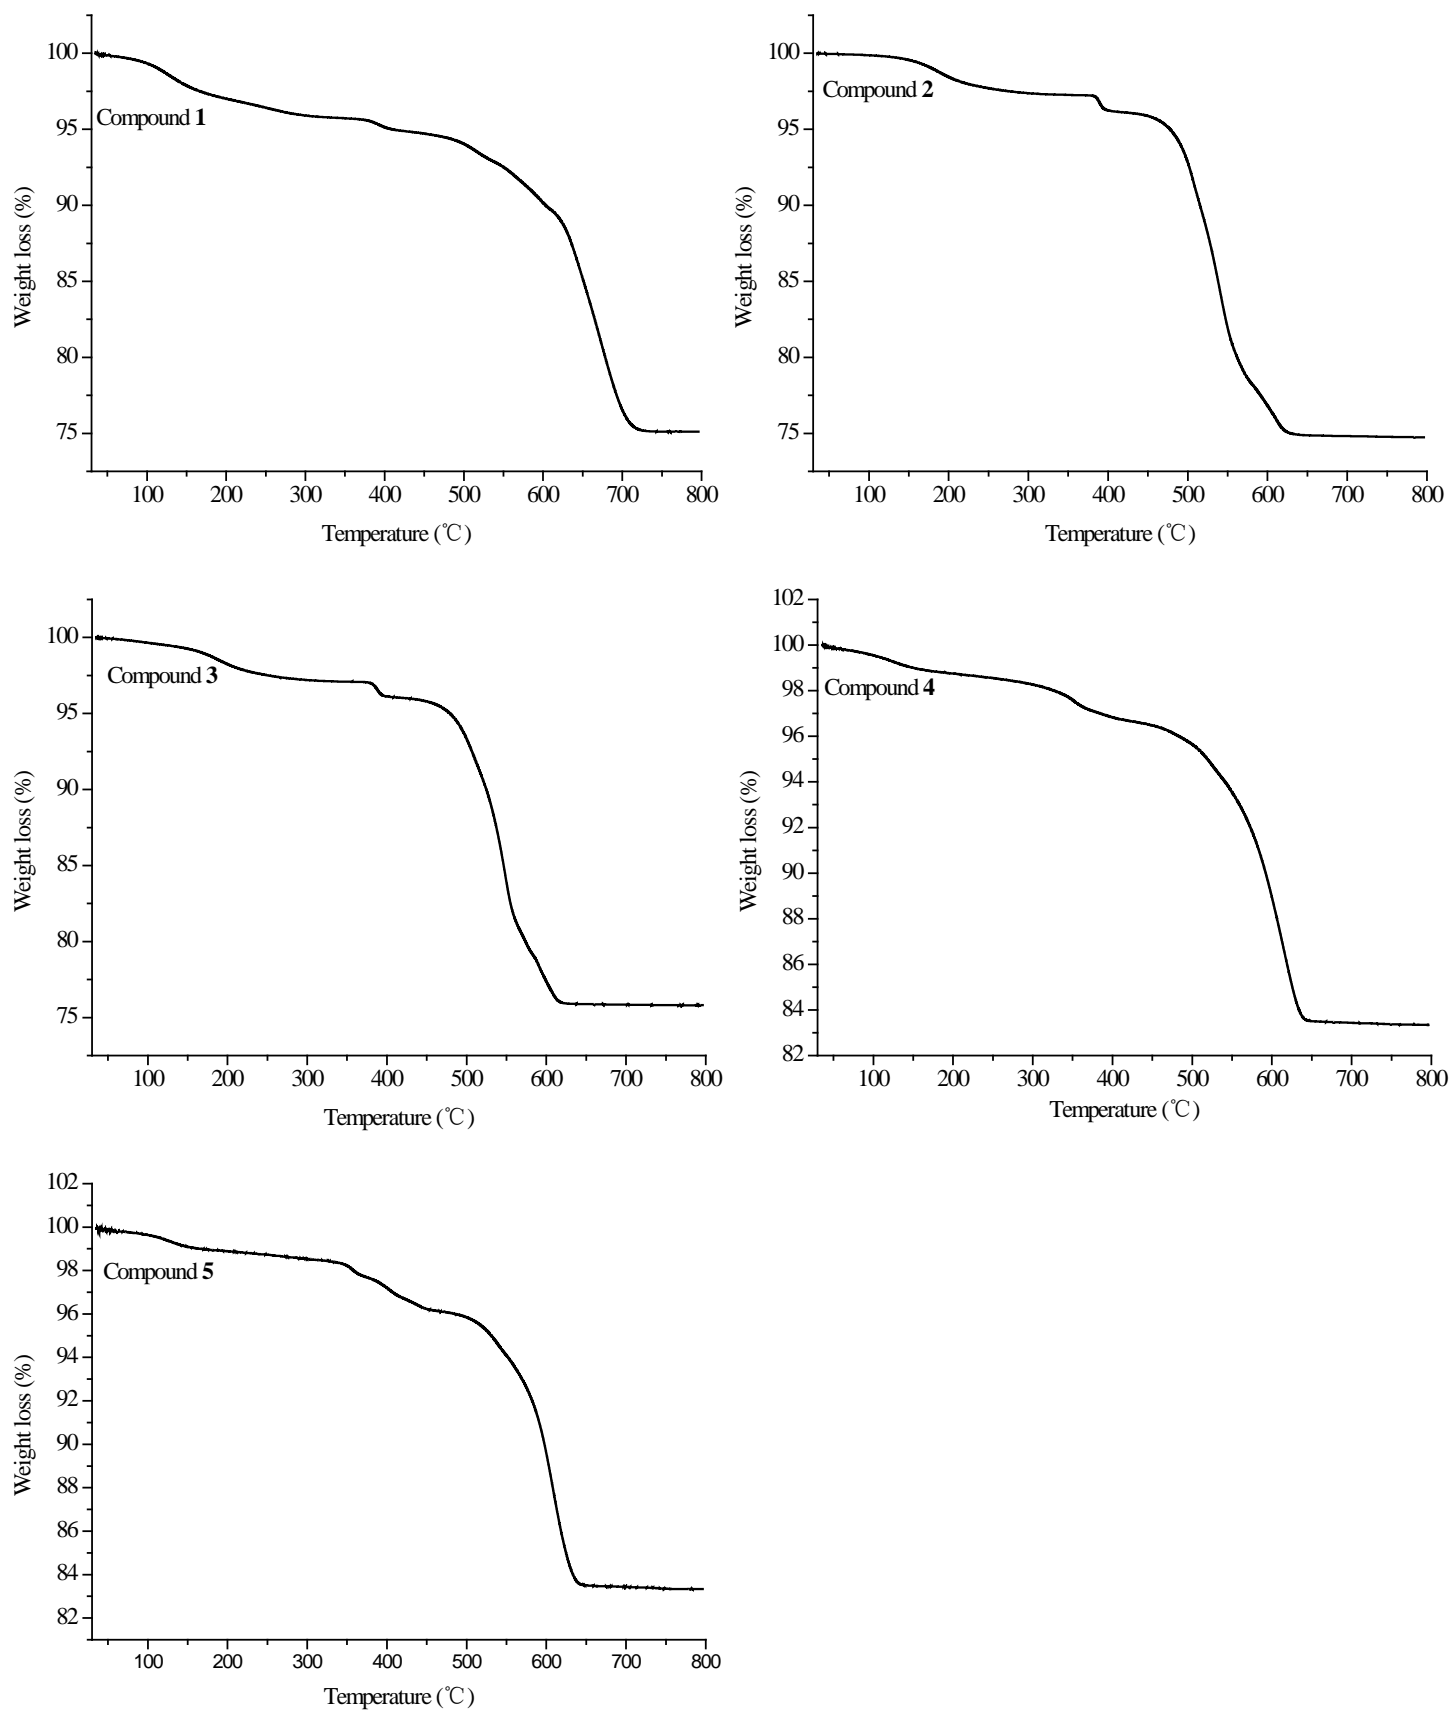

Fig.s7. the TG curves for compound 1-5.

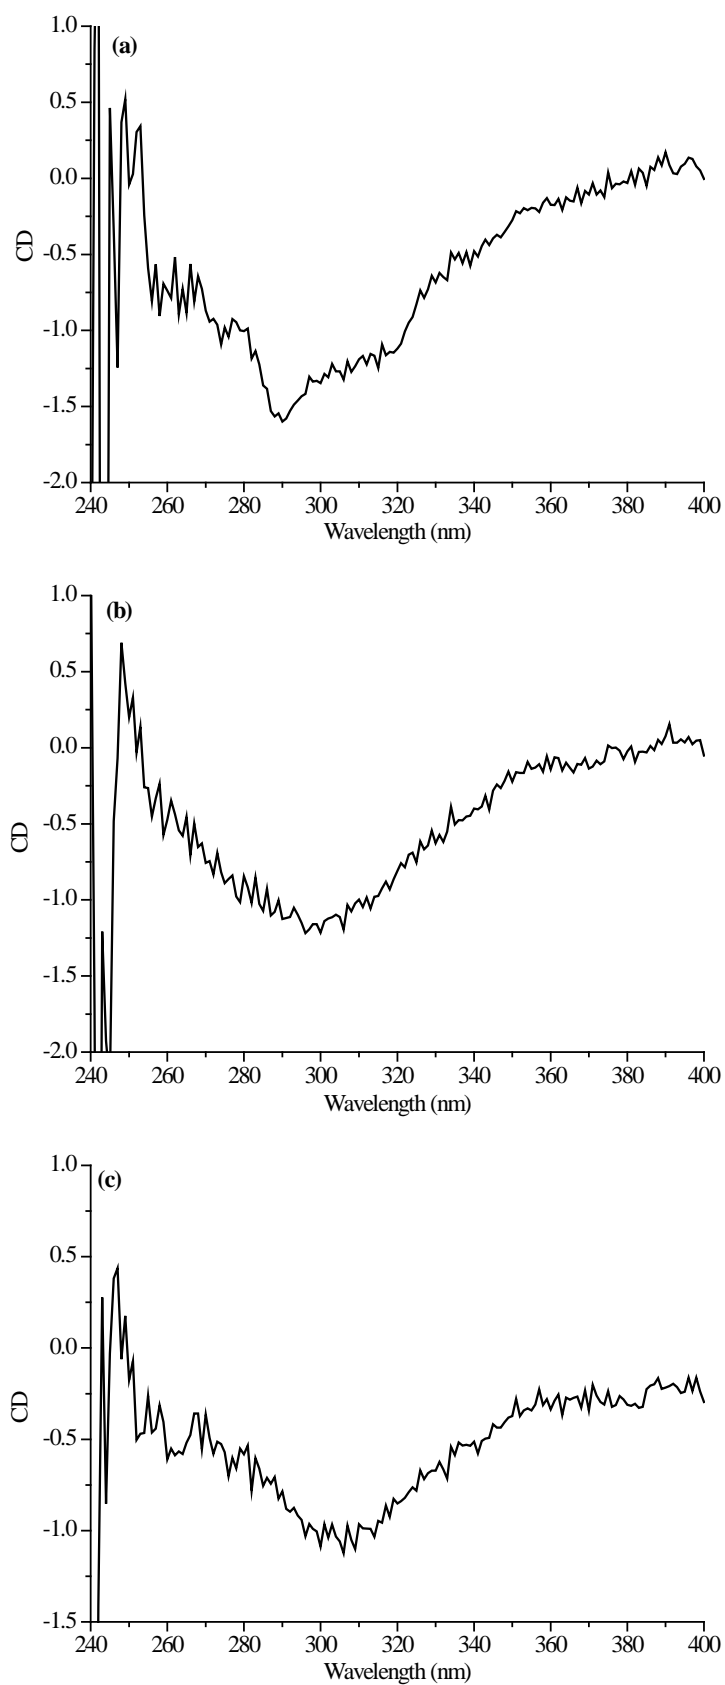

Fig. S8. The CD spectra for compound **1** (a), compound **2** (b) and compound **3** (c).
